# Supplementary material for: Cellular architecture response to aspect ratio tunable nanoarrays
Source: Royal Society of Chemistry journal article supplement (doi:10.1039/d0nr01003k), 2020-01-01
Supplement: d0nr01003k1.pdf [file d0nr01003k1.pdf]

**Supporting information for**

Cellular Architecture Response to Aspect-Ratio Tunable Nanoarrays

*Jing Dai,<sup>a,b,c</sup> Jinkang Gong,<sup>a</sup> Na Kong,<sup>a,\*</sup> and Yuan Yao<sup>a,\*</sup>*

<sup>a</sup> School of Physical Science and Technology, ShanghaiTech University, 393 Middle Huaxia Road, Pudong, Shanghai 201210, China

<sup>b</sup> Shanghai Institute of Ceramics, Chinese Academy of Sciences, 1295 Dingxi Road, Changning, Shanghai 200050, China

<sup>c</sup> University of Chinese Academy of Sciences, 19 Yuquan Road, Shijingshan, Beijing 100049, China

\*To whom correspondence should be addressed,

Email: yaoyuan@shanghaitech.edu.cn; kongna@shanghaitech.edu.cn;

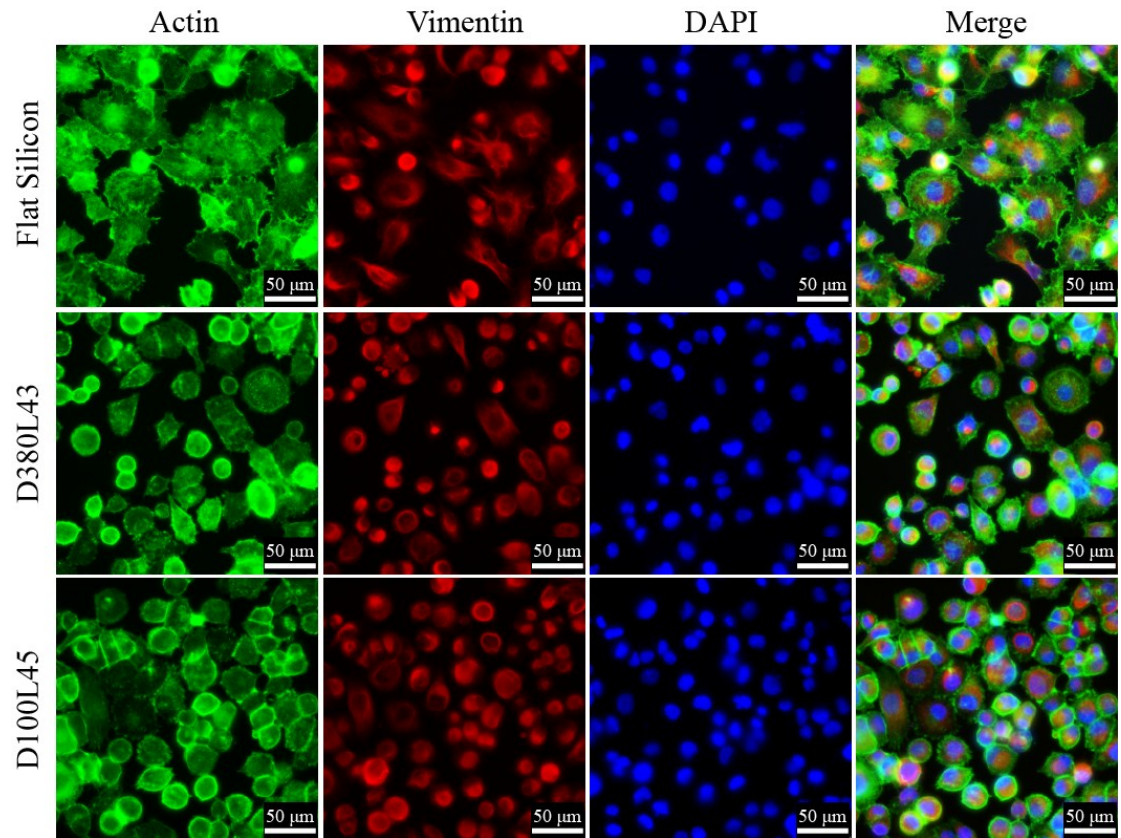

**Fig. S1.** Fluorescence micrographs of cytoskeletal stress fibers of PANC-1 cells on flat silicon, D380L43, and D100L45 nanoarrays. Actin filaments (green), vimentin filaments (red), DAPI (blue).
